# Supplementary material for: Flexible coding of time or distance in hippocampal cells
Source: eLife journal article supplement (doi:10.7554/elife.83930), 2023-10-16
Supplement: supp [file elife-83930-supp-v1.zip]

A

### Fixed Distance sessions CellType measure

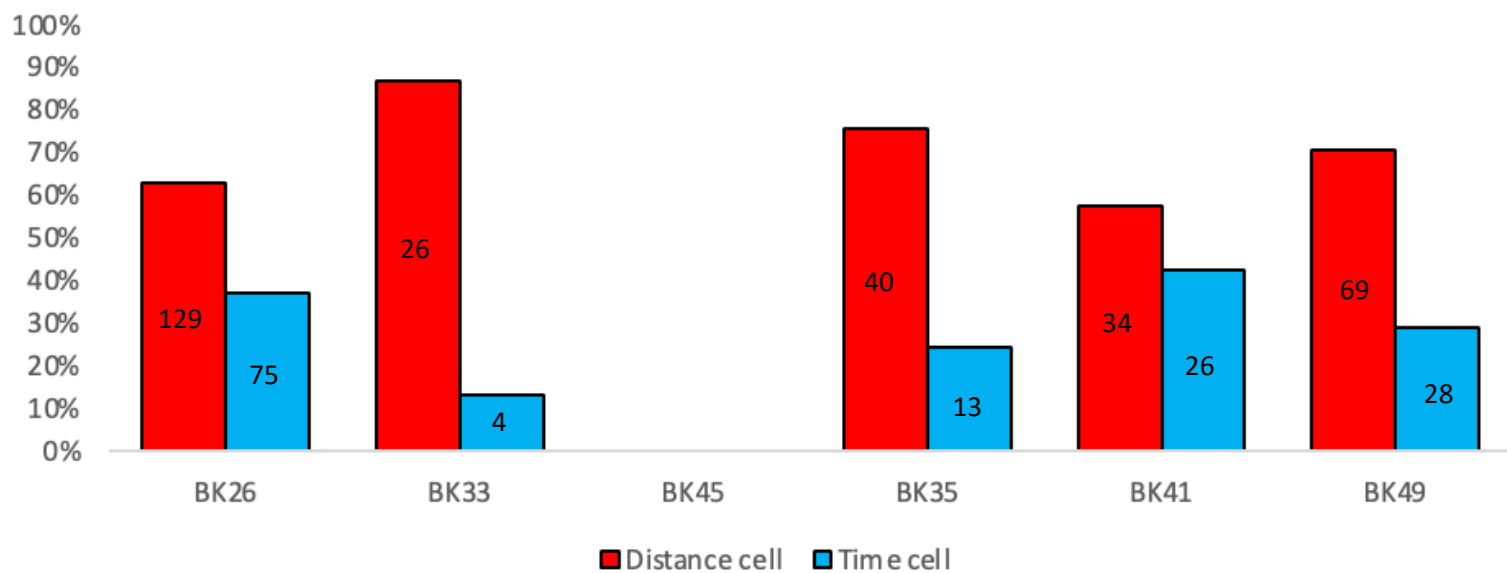

B

### Fixed Time sessions CellType measure

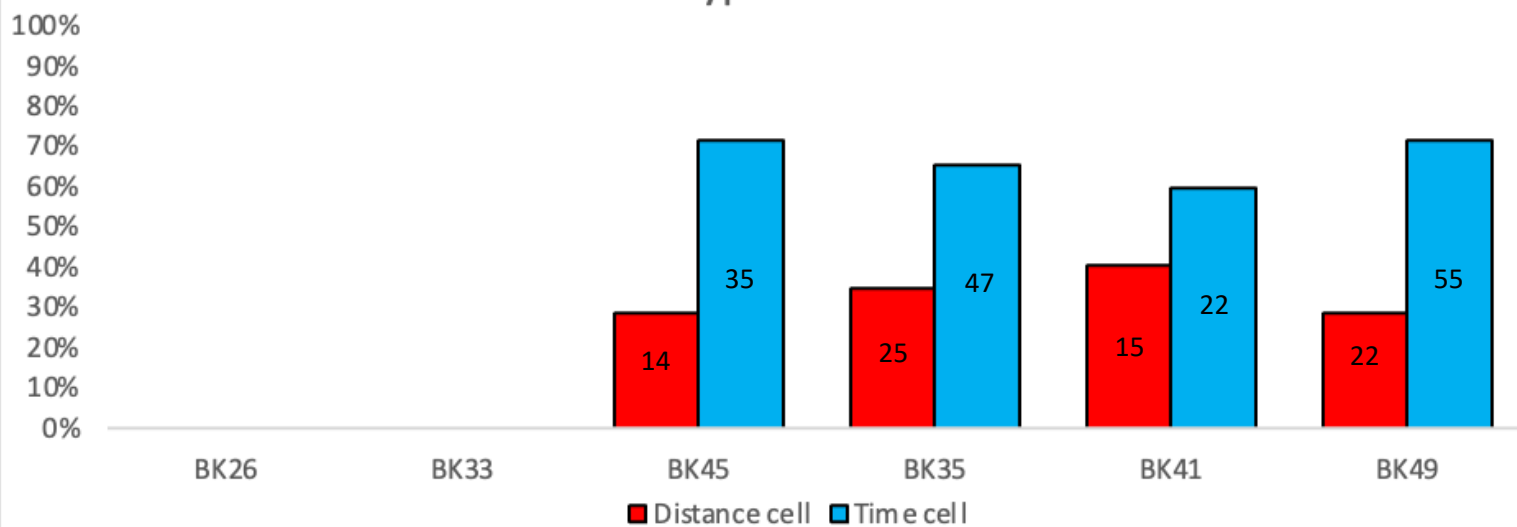

Figure 3-figure supplement 2
