# Supplementary figures and images for: Flexible coding of time or distance in hippocampal cells
Source: eLife journal article supplement (doi:10.7554/elife.83930), 2023-10-16

# Time Cells

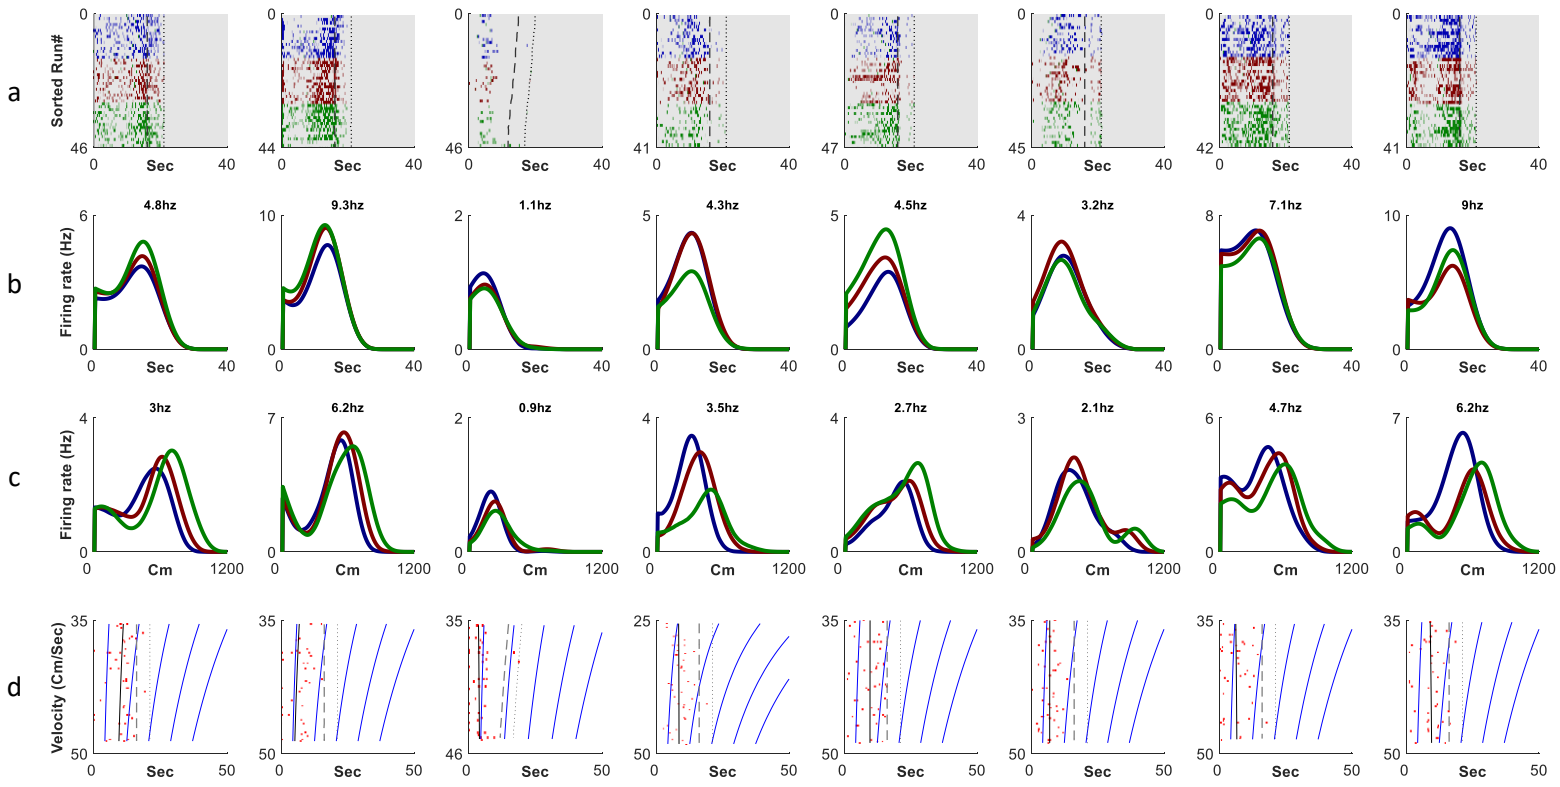

# Distance Cells

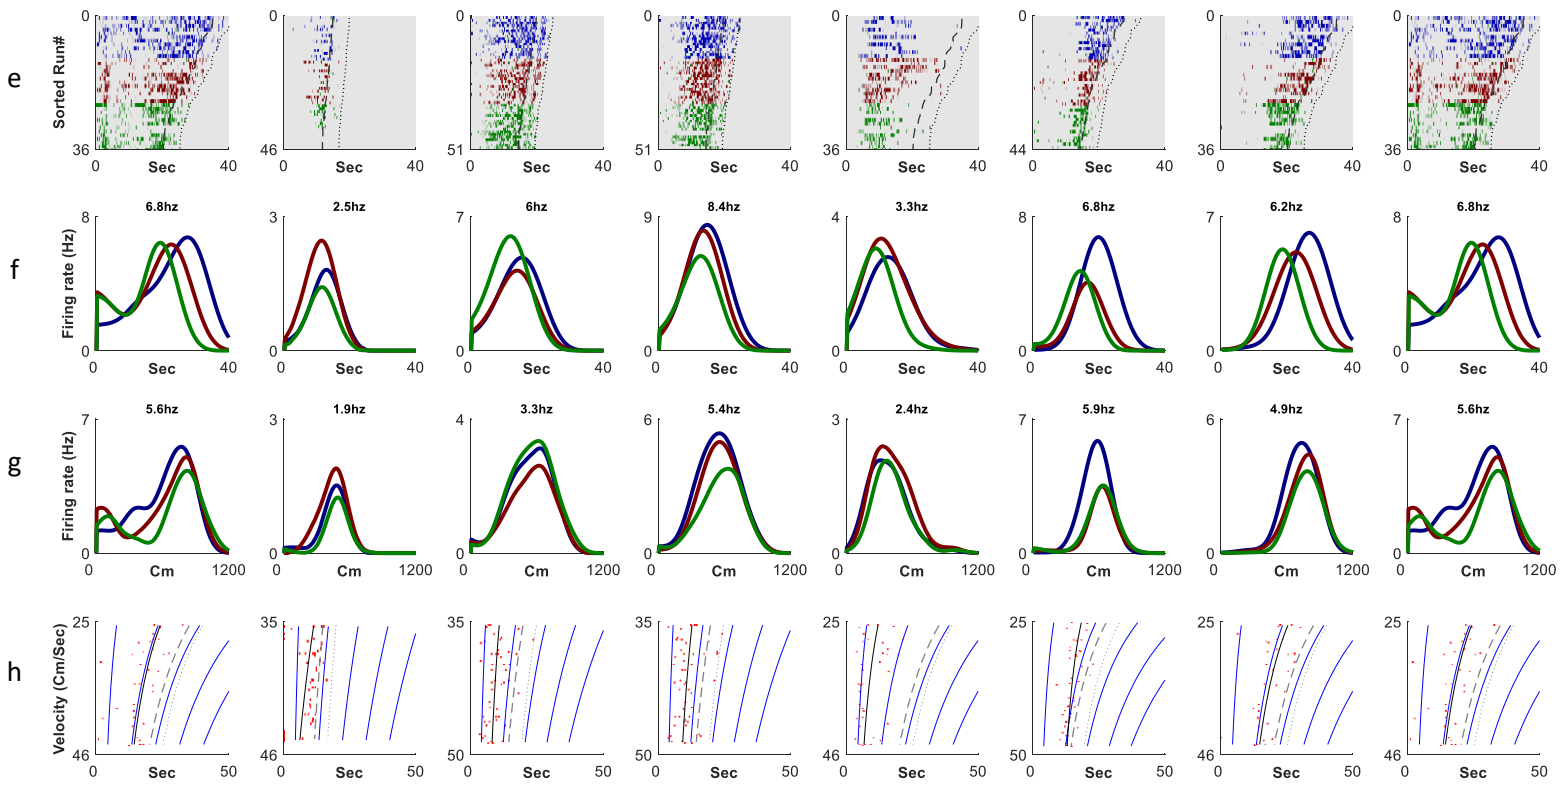

Figure 2-figure supplement 1

Supplement: supp [file elife-83930-supp-v1.zip]

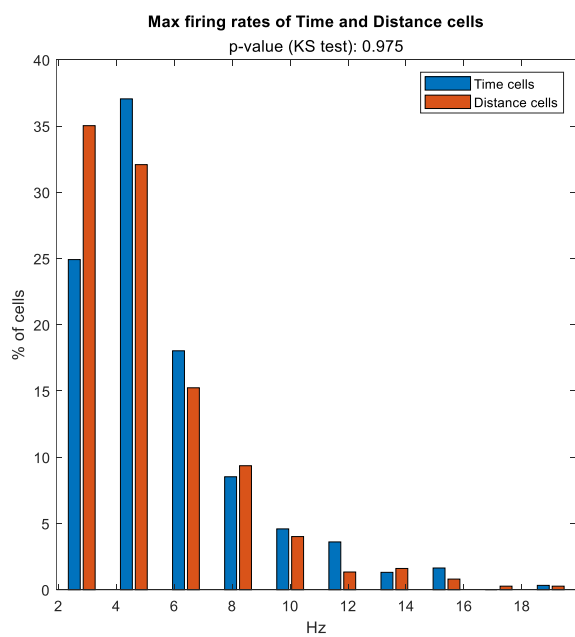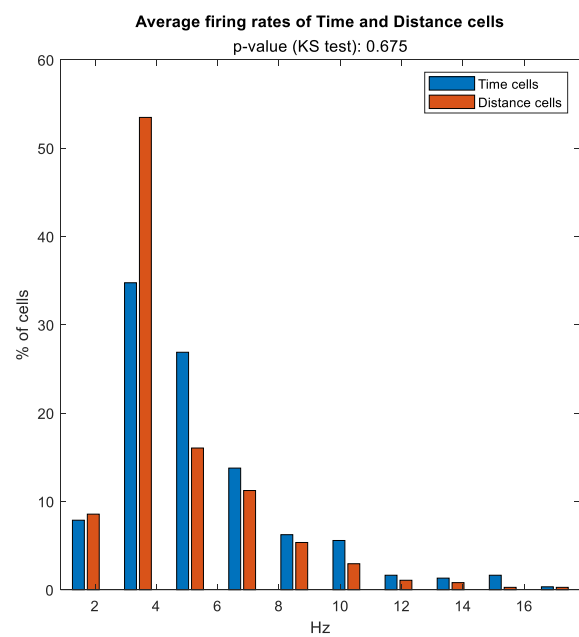

Figure 3-figure supplement 3

Supplement: supp [file elife-83930-supp-v1.zip]

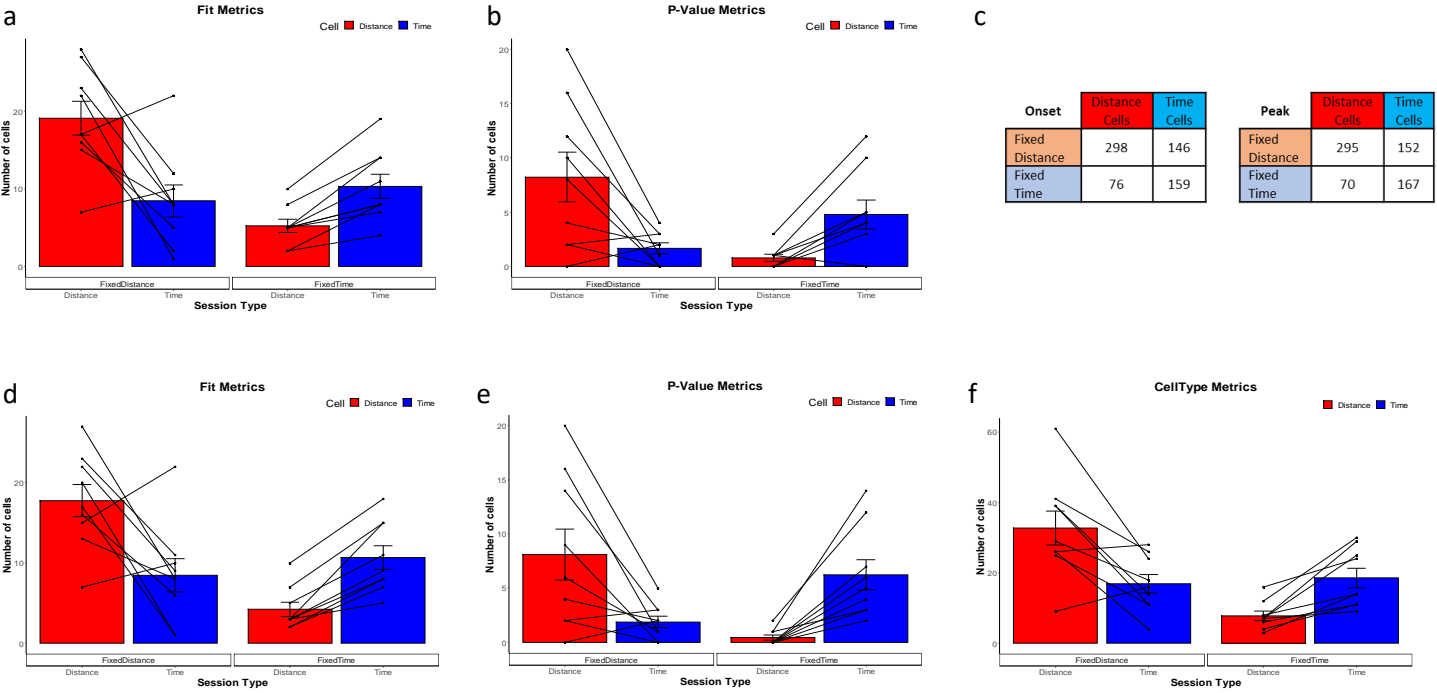

Figure 3-figure supplement 1

Supplement: supp [file elife-83930-supp-v1.zip]
